# Supplementary material
Source: MDPI journal article supplement (https://www.mdpi.com/2076-3417/13/1/320)
Supplement: s1 [file s1 › applsci-2010624-supplementary.pdf]

# Calibration and validation of global horizontal irradiance clear sky models against McClear clear sky model in Morocco

Abderrahmane Mendyl <sup>1,\*</sup>, Brighton Mabasa <sup>2</sup>, Houria Bouzghiba <sup>3</sup>, Tamás Weidinger <sup>1</sup>

<sup>1</sup> Department of Meteorology, Institute of Geography and Earth Sciences, ELTE Eötvös Loránd University, H-1117 Budapest, Hungary

<sup>2</sup> Research and Development Division, South African Weather Service, Pretoria 0001, South Africa

<sup>3</sup> Doctoral School of Environmental Sciences, Hungarian University of Agriculture and Life Science, H-2100 Gödöllő, Hungary

\* Correspondence: amendyl@student.elte.hu or mendyl.abderrahmane@gmail.com

**Abstract:** The study calibrates and compares the capabilities of hourly global horizontal irradiance (GHI) clear sky models for six Moroccan locations, using the McClear clear sky model as a reference. Complex clear sky models namely: Bird, Simplified Solis, Ineichen & Perez; Simple clear sky models namely: Adnot-Bourges-Campana-Gicquel (ABCG), Berger-Duffie and Haurwitz; SOLCAST satellite-based dataset estimates were validated against McClear clear sky model. Pvlib-python was used to configure the models, and ERA5 hourly fractional cloud cover was used to identify clear sky days. The study period was from 2014 to 2021 and the study sites were in different climatic regions in Morocco. Bar graphs, tables and the quantitative statistical metrics namely relative Mean Bias Error (rMBE), relative Root Mean Square Error (rRMSE), relative Mean Absolute Error (rMAE) and the coefficient of determination ( $R^2$ ) were used to quantify the skill of the clear sky model at different sites. The overall rMBE was negative in 5/6 sites, indicating consistent overestimation of GHI, and positive in Tantan (14.4%), indicating frequent underestimation of GHI. Overall rRMSE varied from 6–22% suggesting a strong agreement between clear sky models and McClear clear sky model. The overall correlation was greater than 0.96, indicating a very strong relationship. Overall, the Bird clear sky model proved to be the most feasible. Complex clear sky models outperformed simple clear sky models. The SOLCAST satellite-based dataset and ERA5 cloud fraction information could well be used with quantifiable certainty as an accurate clear sky model in the study region and in other areas where complex clear sky models' inputs are not available.

**Keywords:** Clear sky model; global horizontal irradiance; calibration, validation; solar energy applications; Pvlib-python, SOLCAST, Fifth generation European Centre for Medium-Range Weather Forecasts atmospheric reanalysis (ERA5); statistical metrics.

**Citation:** Mendyl, A.; Mabasa, B.; Bouzghiba, H.; Weidinger, T. Calibration and Validation of Global Horizontal Irradiance Clear Sky Models against McClear Clear Sky Model in Morocco. *Appl. Sci.* **2023**, *13*, 320. <https://doi.org/10.3390/app13010320>

Academic Editors: Harry D. Kambezidis and Basil Psiloglou

Received: 19 October 2022

Revised: 19 December 2022

Accepted: 22 December 2022

Published: 27 December 2022

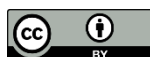

**Copyright:** © 2022 by the authors. Submitted for possible open access publication under the terms and conditions of the Creative Commons Attribution (CC BY) license (<https://creativecommons.org/licenses/by/4.0/>).

**Table S1.** Clear sky model predicted irradiance versus McClear model prediction at Marrakech station, with validation metrics. The colours in the table are used to indicate the clear model skill in estimating GHI based statistical metrics with blue representing excellent performance, green good performance, yellow average performance and pink poor performance.

| Model            | Observation mean | Model mean | MBE    | rMBE   | RMSE  | rRMSE | MAE   | rMAE  | R <sup>2</sup> |
|------------------|------------------|------------|--------|--------|-------|-------|-------|-------|----------------|
| Bird             | 518.06           | 501.4      | -16.67 | -3.22  | 21.72 | 4.19  | 17.68 | 3.41  | 0.999          |
| Solis            | 518.06           | 489.82     | -28.24 | -5.45  | 36.78 | 7.1   | 28.25 | 5.45  | 0.997          |
| Ineichen & Perez | 518.06           | 471.66     | -46.40 | -8.96  | 51.99 | 10.04 | 46.61 | 8.99  | 0.998          |
| SOLCAST          | 518.06           | 496.29     | -21.77 | -4.2   | 28.2  | 5.44  | 23.23 | 4.48  | 0.999          |
| Haurwitz         | 518.06           | 494.14     | -23.92 | -4.62  | 39.82 | 7.69  | 32.14 | 6.2   | 0.995          |
| Berger-Duffie    | 518.06           | 475.41     | -42.65 | -8.23  | 69.24 | 13.36 | 56.02 | 10.81 | 0.994          |
| ABCG             | 518.06           | 443.15     | -74.91 | -14.46 | 90.29 | 17.43 | 76.08 | 14.69 | 0.994          |

**Table S2.** Clear sky model predicted irradiance versus McClear model prediction at Fes station, with validation metrics. The colours in the table are used to indicate the clear model skill in estimating GHI based statistical metrics with blue representing excellent performance, green good performance, yellow average performance and pink poor performance.

| Model            | Observation | Model Mean | MBE    | rMBE  | RMSE  | rRMSE | MAE   | rMAE  | R <sup>2</sup> |
|------------------|-------------|------------|--------|-------|-------|-------|-------|-------|----------------|
| Bird             | 494.69      | 482.84     | -11.85 | -2.4  | 14.96 | 3.02  | 12.65 | 2.56  | 0.999          |
| Solis            | 494.69      | 484.59     | -10.1  | -2.04 | 16.56 | 3.35  | 11.62 | 2.35  | 0.999          |
| Ineichen & Perez | 494.69      | 474.13     | -20.56 | -4.16 | 28.17 | 5.69  | 22.7  | 4.59  | 0.999          |
| SOLCAST          | 494.69      | 495.02     | 0.33   | 0.07  | 48.84 | 9.87  | 35.28 | 7.13  | 0.985          |
| Haurwitz         | 494.69      | 464.66     | -30.03 | -6.07 | 39.69 | 8.02  | 32.64 | 6.6   | 0.997          |
| Berger-Duffie    | 494.69      | 449.76     | -44.93 | -9.08 | 68.91 | 13.93 | 55.18 | 11.16 | 0.997          |
| ABCG             | 494.69      | 494.69     | 78.67  | 18.91 | 92.36 | 22.20 | 79.01 | 18.99 | 0.996          |

**Table S3.** Clear sky model predicted irradiance versus McClear model prediction at Agadir station, with validation metrics. The colours in the table are used to indicate the clear model skill in estimating GHI based statistical metrics with blue representing excellent performance, green good performance, yellow average performance and pink poor performance.

| Model            | Observation Mean | Model Mean | MBE    | rMBE   | RMSE  | rRMSE | MAE   | rMAE  | R2    |
|------------------|------------------|------------|--------|--------|-------|-------|-------|-------|-------|
| Bird             | 485.91           | 468.64     | -17.26 | -3.55  | 28.63 | 5.89  | 19.41 | 3.99  | 0.997 |
| SOLIS            | 485.91           | 443.38     | -42.52 | -8.75  | 61.67 | 12.69 | 42.52 | 8.75  | 0.988 |
| Ineichen & Perez | 485.91           | 465.69     | -20.21 | -4.16  | 30.31 | 6.24  | 24.54 | 5.05  | 0.997 |
| SOLCAST          | 485.91           | 461.29     | -24.62 | -5.07  | 39.09 | 8.04  | 25.84 | 5.32  | 0.995 |
| Haurwitz         | 485.91           | 468.77     | -17.13 | -3.53  | 37.35 | 7.69  | 30.02 | 6.18  | 0.994 |
| Berger-Duffie    | 485.91           | 452.92     | -32.98 | -6.79  | 63.47 | 13.06 | 50.93 | 10.48 | 0.993 |
| ABCG             | 485.91           | 419.79     | -66.11 | -13.61 | 83.81 | 17.25 | 68.53 | 14.10 | 0.993 |

**Table S4.** Clear sky model predicted irradiance versus McClear model prediction at Tangier station, with validation metrics. The colours in the table are used to indicate the clear model skill in estimating GHI based statistical metrics with blue representing excellent performance, green good performance, yellow average performance and pink poor performance.

| Model            | Observation | Model mean | MBE    | rMBE   | RMSE  | rRMSE | MAE   | rMAE  | R2    |
|------------------|-------------|------------|--------|--------|-------|-------|-------|-------|-------|
| Bird             | 545.24      | 525.21     | -20.02 | -3.67  | 22.76 | 4.17  | 20.51 | 3.76  | 0.999 |
| Solis            | 545.24      | 516.61     | -28.62 | -5.25  | 34.62 | 6.35  | 28.63 | 5.25  | 0.999 |
| Ineichen & Perez | 545.24      | 533.11     | -12.13 | -2.22  | 21.48 | 3.94  | 17.94 | 3.29  | 0.999 |
| SOLCAST          | 545.24      | 526.32     | -18.92 | -3.47  | 23.24 | 4.26  | 19.57 | 3.59  | 0.999 |
| Haurwitz         | 545.24      | 532.79     | -12.45 | -2.28  | 29.72 | 5.45  | 23.37 | 4.29  | 0.997 |
| Berger-Duffie    | 545.24      | 516.61     | -28.62 | -5.25  | 34.62 | 6.35  | 28.62 | 5.25  | 0.999 |
| ABCG             | 545.24      | 480.12     | -65.11 | -11.94 | 79.57 | 14.59 | 66.49 | 12.19 | 0.996 |

**Table S5.** Clear sky model predicted irradiance versus McClear model prediction at Ouarzazate station, with validation metrics. The colours in the table are used to indicate the clear model skill in estimating GHI based statistical metrics with blue representing excellent performance, green good performance, yellow average performance and pink poor performance.

| Model            | Observation | Model mean | MBE     | rMBE   | RMSE   | rRMSE | MAE    | rMAE  | R <sup>2</sup> |
|------------------|-------------|------------|---------|--------|--------|-------|--------|-------|----------------|
| Bird             | 518.26      | 463.56     | -54.7   | -10.55 | 64.8   | 12.50 | 56.95  | 10.99 | 0.994          |
| Solis            | 518.26      | 450.71     | -67.56  | -13.03 | 77.63  | 14.98 | 68.69  | 13.25 | 0.995          |
| Ineichen & Perez | 518.26      | 461.6      | -56.66  | -10.93 | 67.64  | 13.05 | 59.09  | 11.40 | 0.995          |
| SOLCAST          | 518.26      | 450.27     | -67.99  | -13.12 | 105.55 | 20.37 | 71.97  | 13.89 | 0.963          |
| Haurwitz         | 518.26      | 454.86     | -63.40  | -12.23 | 81.37  | 15.70 | 69.23  | 13.36 | 0.987          |
| Berger-Duffie    | 518.26      | 440.97     | -77.3   | -14.91 | 104.2  | 20.11 | 87.16  | 16.82 | 0.987          |
| ABCG             | 518.26      | 407.34     | -110.92 | -21.40 | 130.81 | 25.24 | 113.26 | 21.85 | 0.98           |

**Table S6.** Clear sky model predicted irradiance versus McClear model prediction at Tantan station, with validation metrics. The colours in the table are used to indicate the clear model skill in estimating GHI based statistical metrics with blue representing excellent performance, green good performance, yellow average performance and pink poor performance.

| Model            | Observation | Model mean | MBE   | rMBE  | RMSE   | rRMSE | MAE   | rMAE  | R <sup>2</sup> |
|------------------|-------------|------------|-------|-------|--------|-------|-------|-------|----------------|
| Bird             | 379.50      | 452.26     | 72.75 | 19.17 | 97.49  | 25.69 | 82.61 | 21.77 | 0.968          |
| Solis            | 379.50      | 423.04     | 43.54 | 11.47 | 89.27  | 23.52 | 74.32 | 19.58 | 0.948          |
| Ineichen & Perez | 379.50      | 445.26     | 65.76 | 17.33 | 88.83  | 23.41 | 75.15 | 19.8  | 0.971          |
| SOLCAST          | 379.50      | 460.85     | 81.35 | 21.44 | 106.04 | 27.94 | 90.49 | 23.84 | 0.966          |
| Haurwitz         | 379.50      | 439.83     | 60.33 | 15.89 | 81.17  | 21.39 | 67.02 | 17.66 | 0.975          |
| Berger-Duffie    | 379.50      | 428.39     | 48.89 | 12.88 | 75.42  | 19.87 | 60.12 | 15.84 | 0.973          |
| ABCG             | 379.50      | 392.44     | 12.94 | 3.41  | 54.91  | 14.47 | 43.86 | 11.56 | 0.977          |

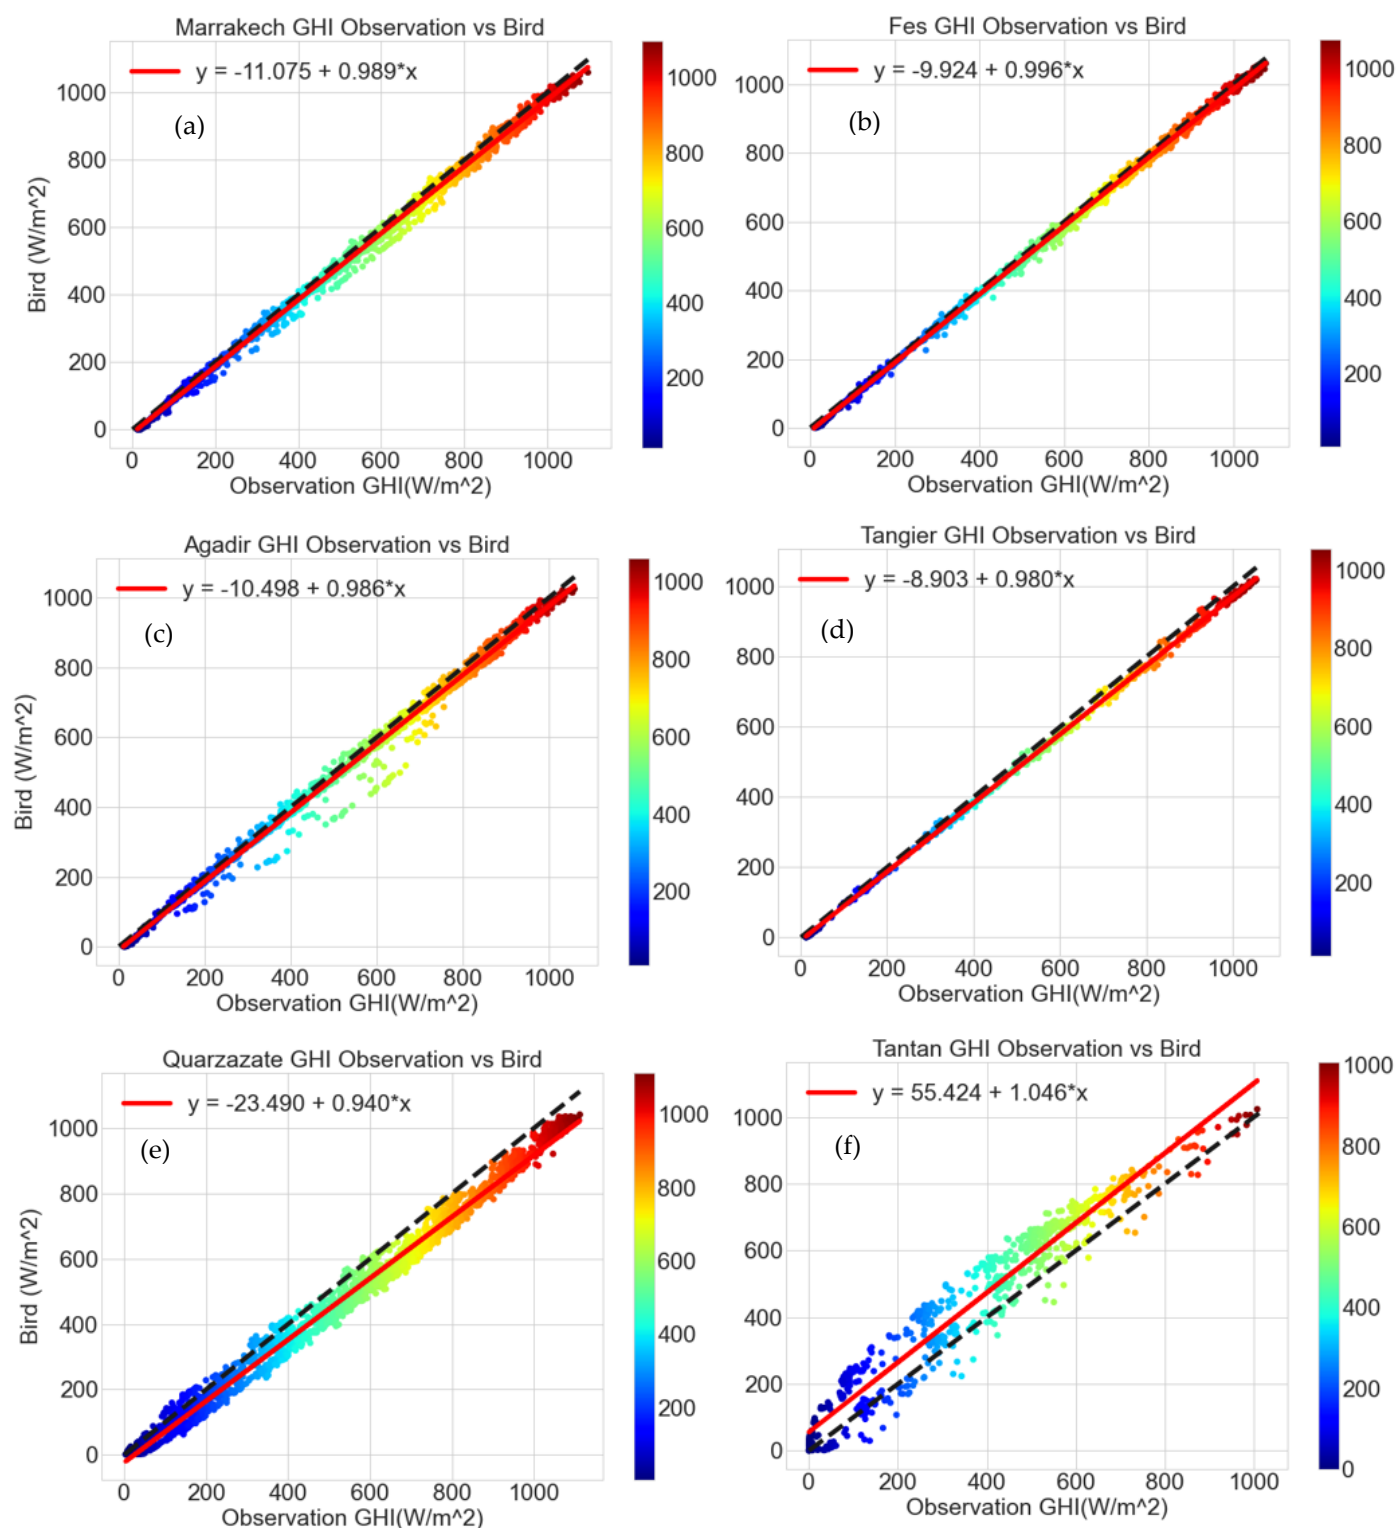

**Figure S1.** Scatter plot of McClear modelled hourly GHI and Bird clear sky modelled hourly GHI at (a) Marrakech station, (b) Fes station, (c), Agadir station, (d) Quarzazate station, (e) Tangier and (f) Tantan.

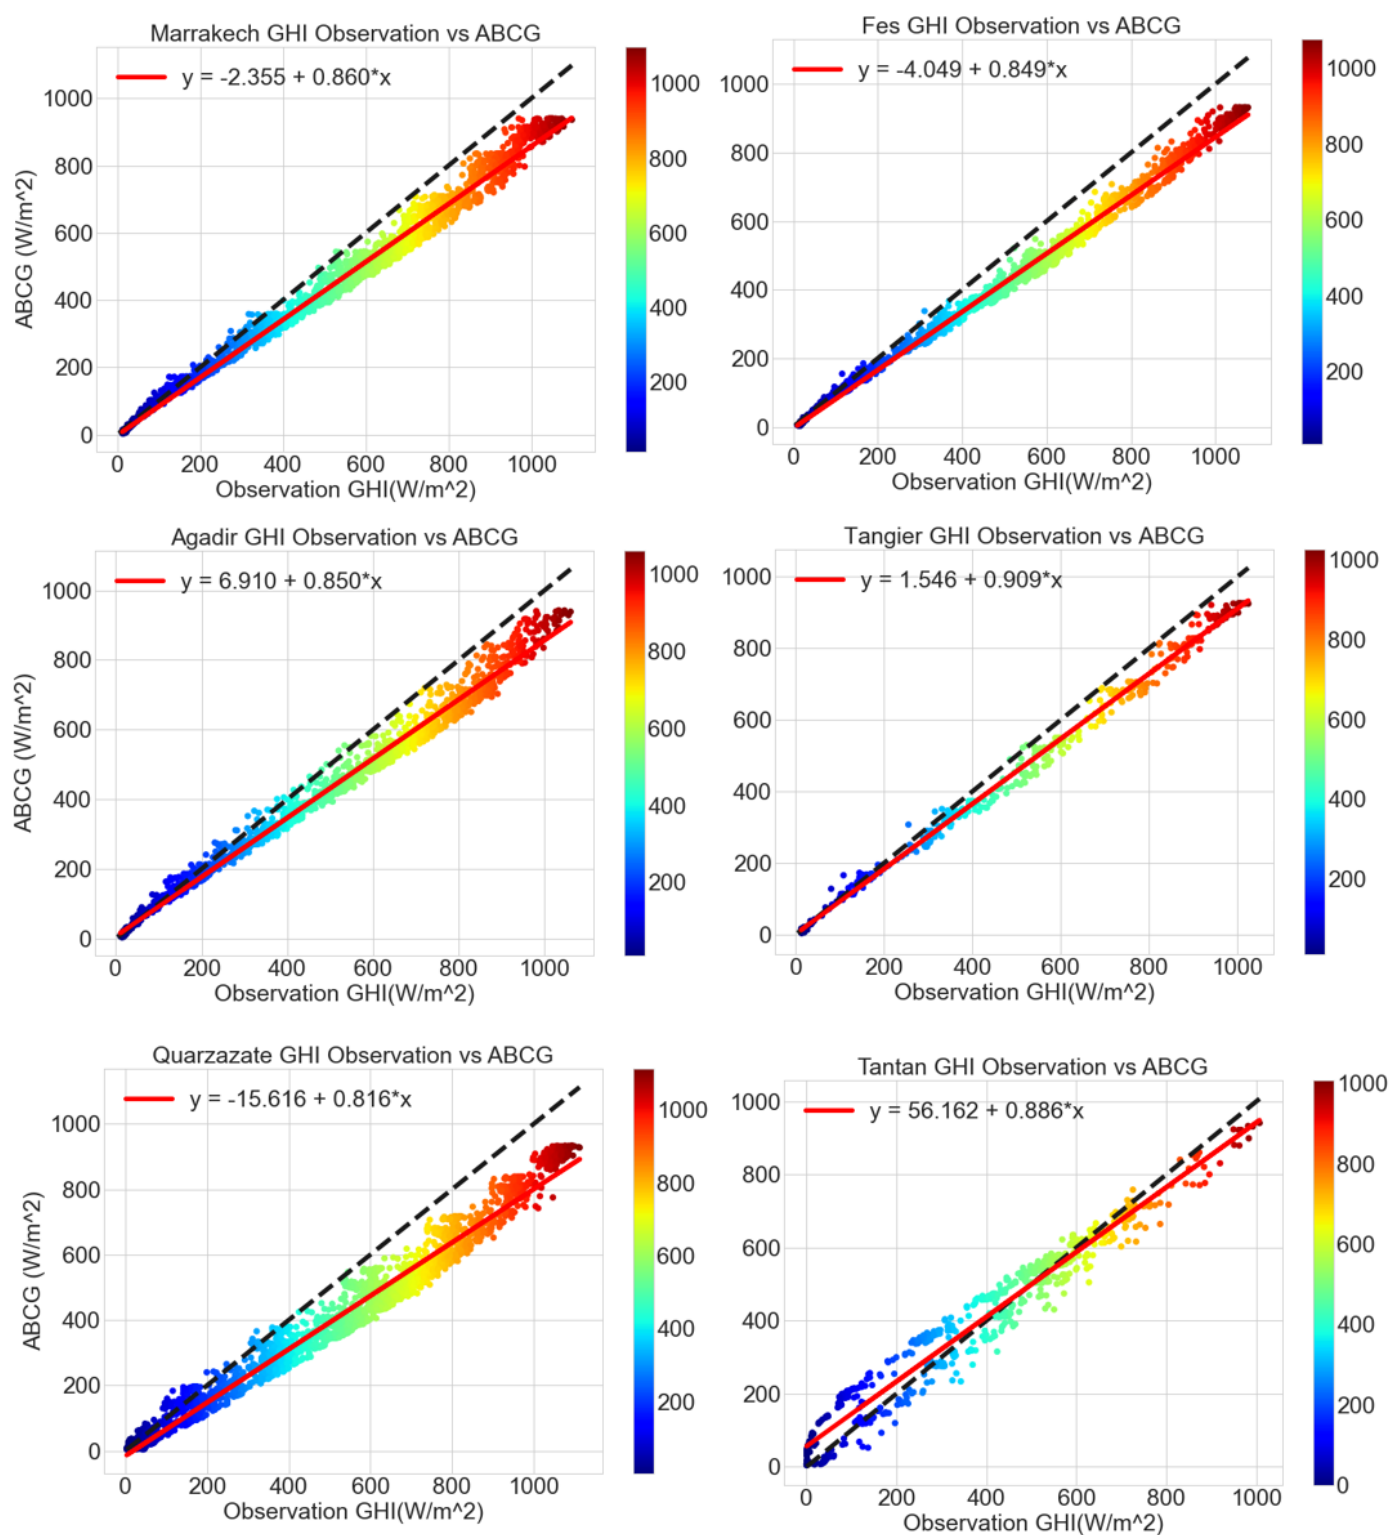

**Figure S2.** Scatter plot of McClear modelled hourly GHI and Adnot-Bourges-Campana-Gicquel (ABCG) clear sky modelled hourly GHI at (a) Marrakech station, (b) Fes station, (c), Agadir station, (d) Quarzazate station, (e) Tangier and (f) Tantan.

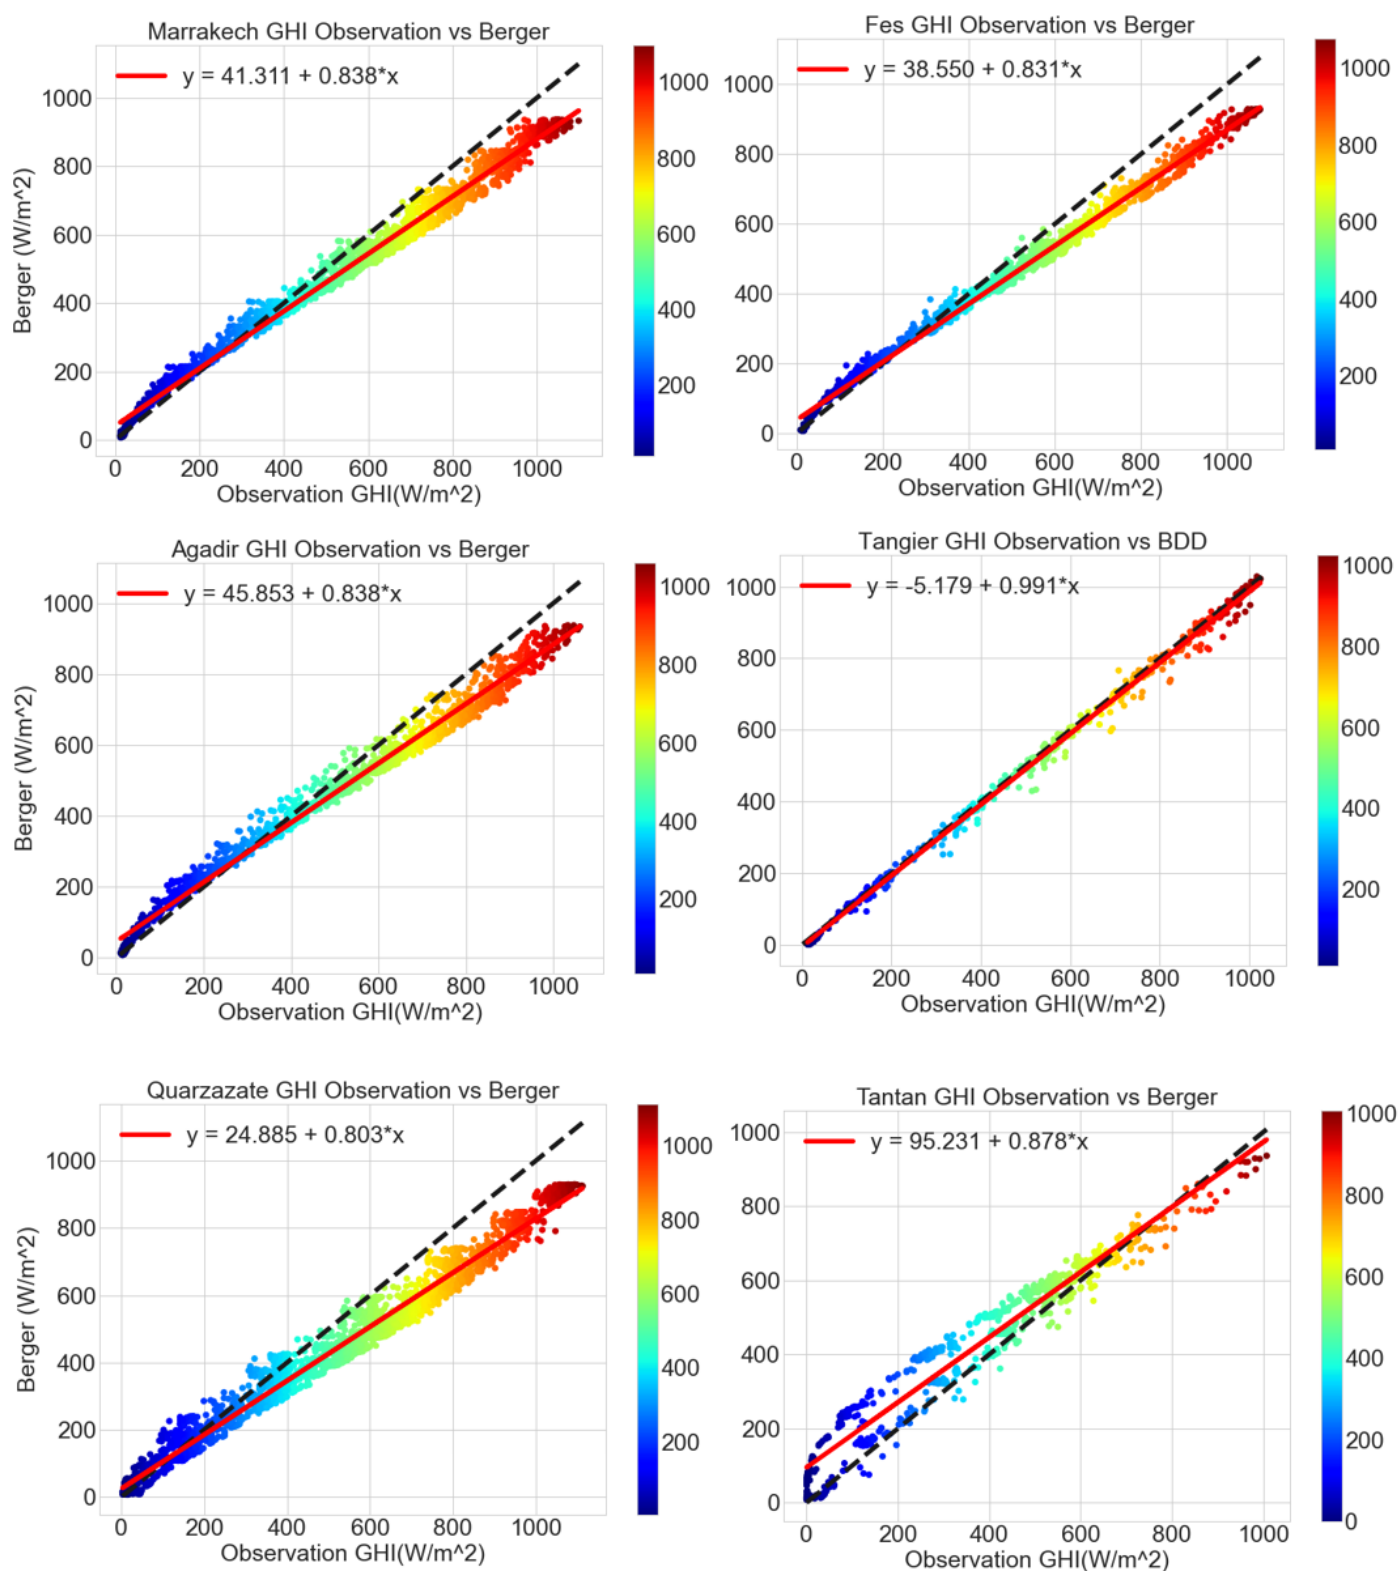

**Figure S3.** Scatter plot of McClear modelled hourly GHI and Berger-Duffie clear sky modelled hourly GHI at (a) Marrakech station, (b) Fes station, (c), Agadir station, (d) Quarzazate station, (e) Tangier and (f) Tantan.

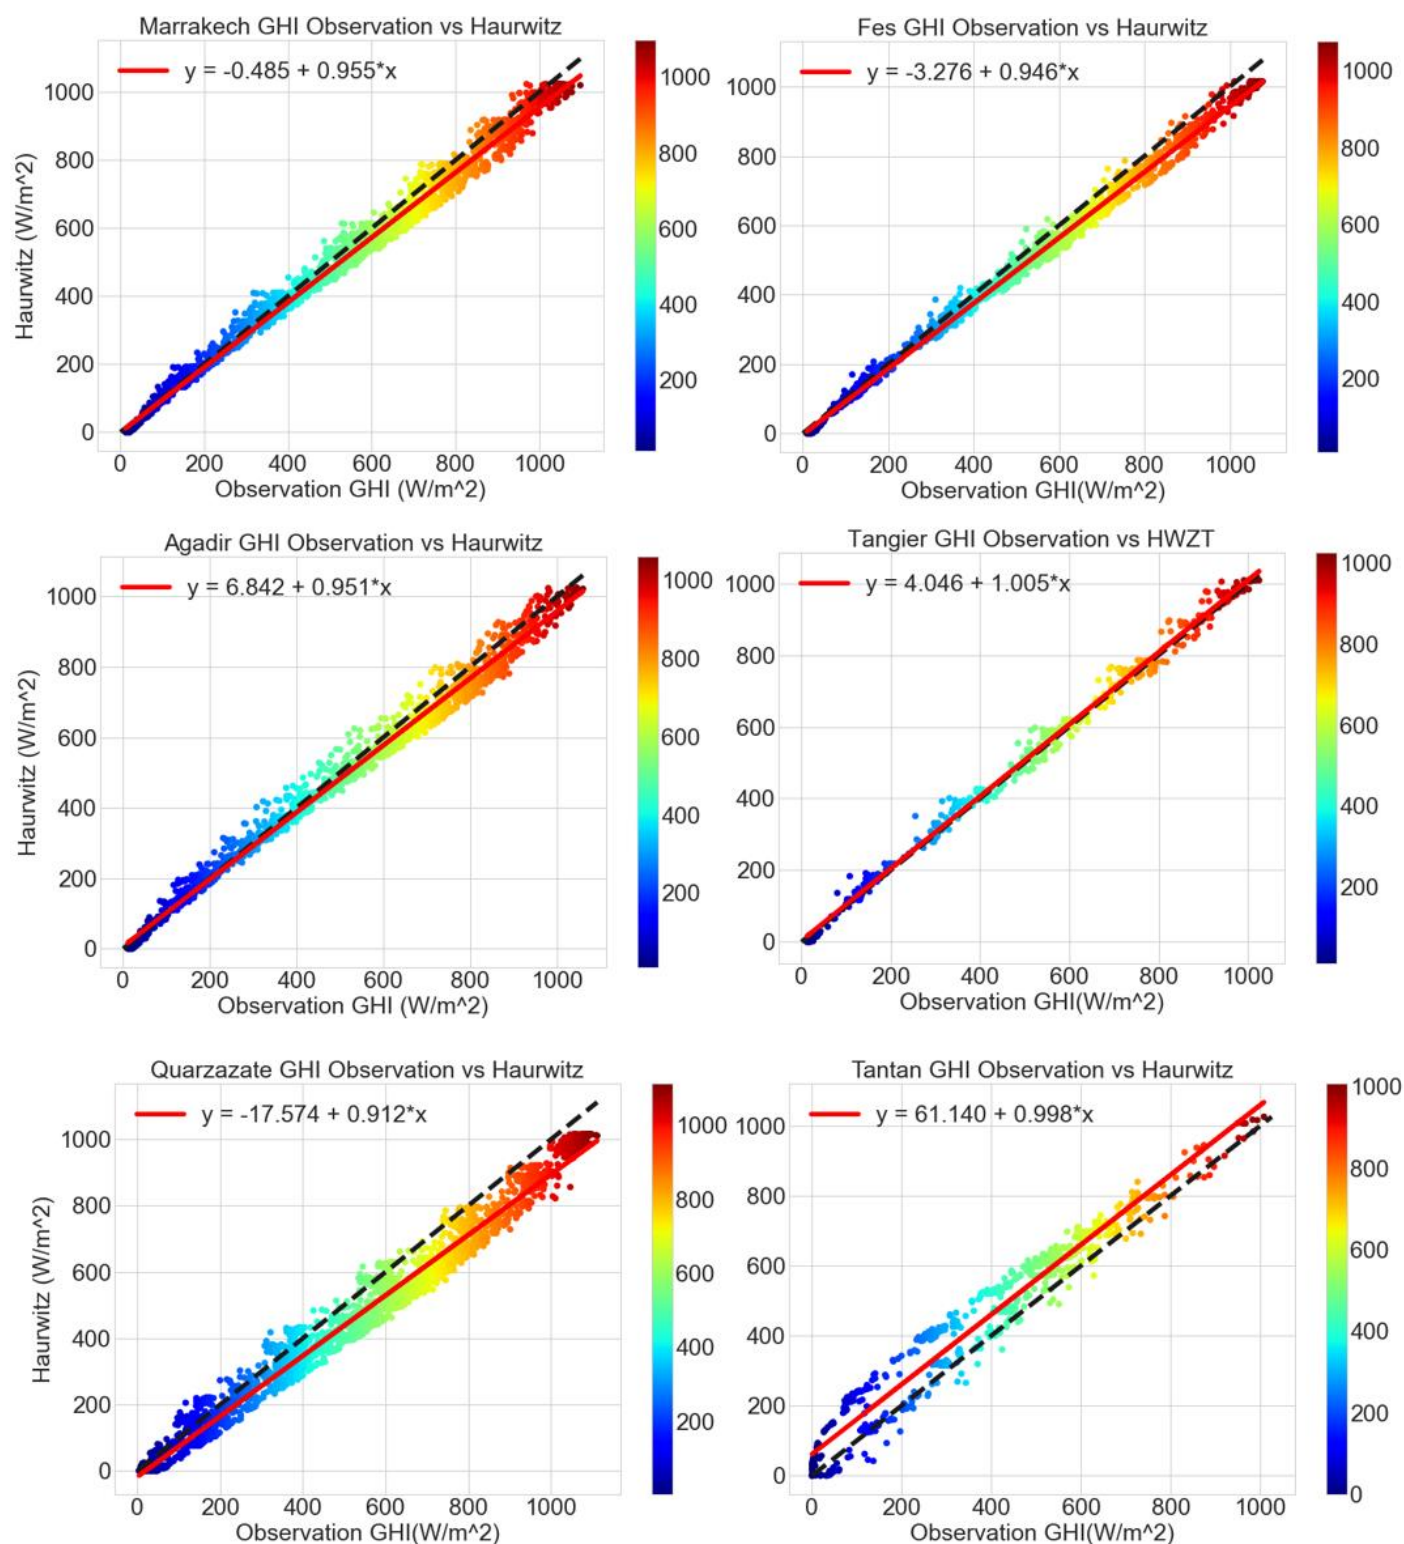

**Figure S4.** Scatter plot of McClear modelled hourly GHI and Haurwitz clear sky modelled hourly GHI at (a) Marrakech station, (b) Fes station, (c), Agadir station, (d) Quarzazate station, (e) Tangier and (f) Tantan.

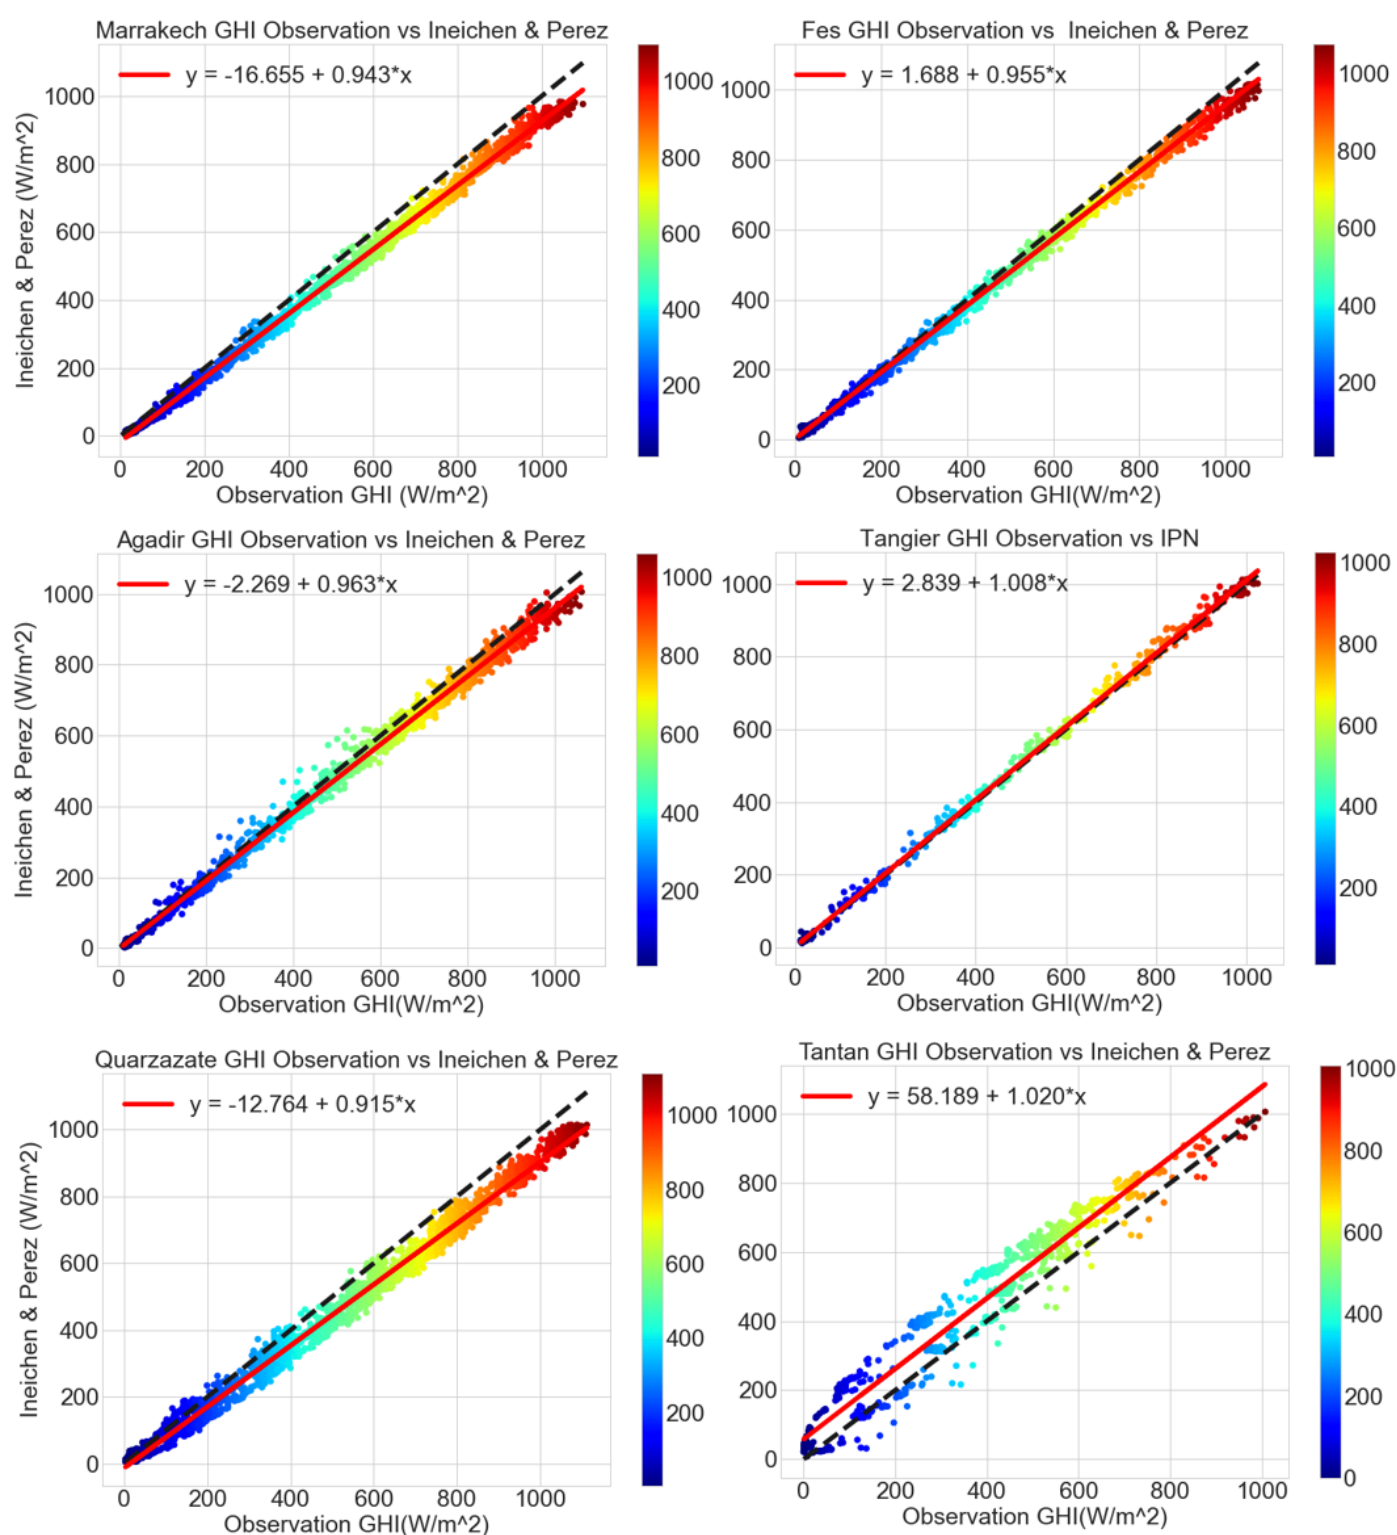

**Figure S5.** Scatter plot of McClear modelled hourly GHI and Ineichen & Perez (IPN) clear sky modelled hourly GHI at (a) Marrakech station, (b) Fes station, (c), Agadir station, (d) Quarzazate station, (e) Tangier and (f) Tantan.

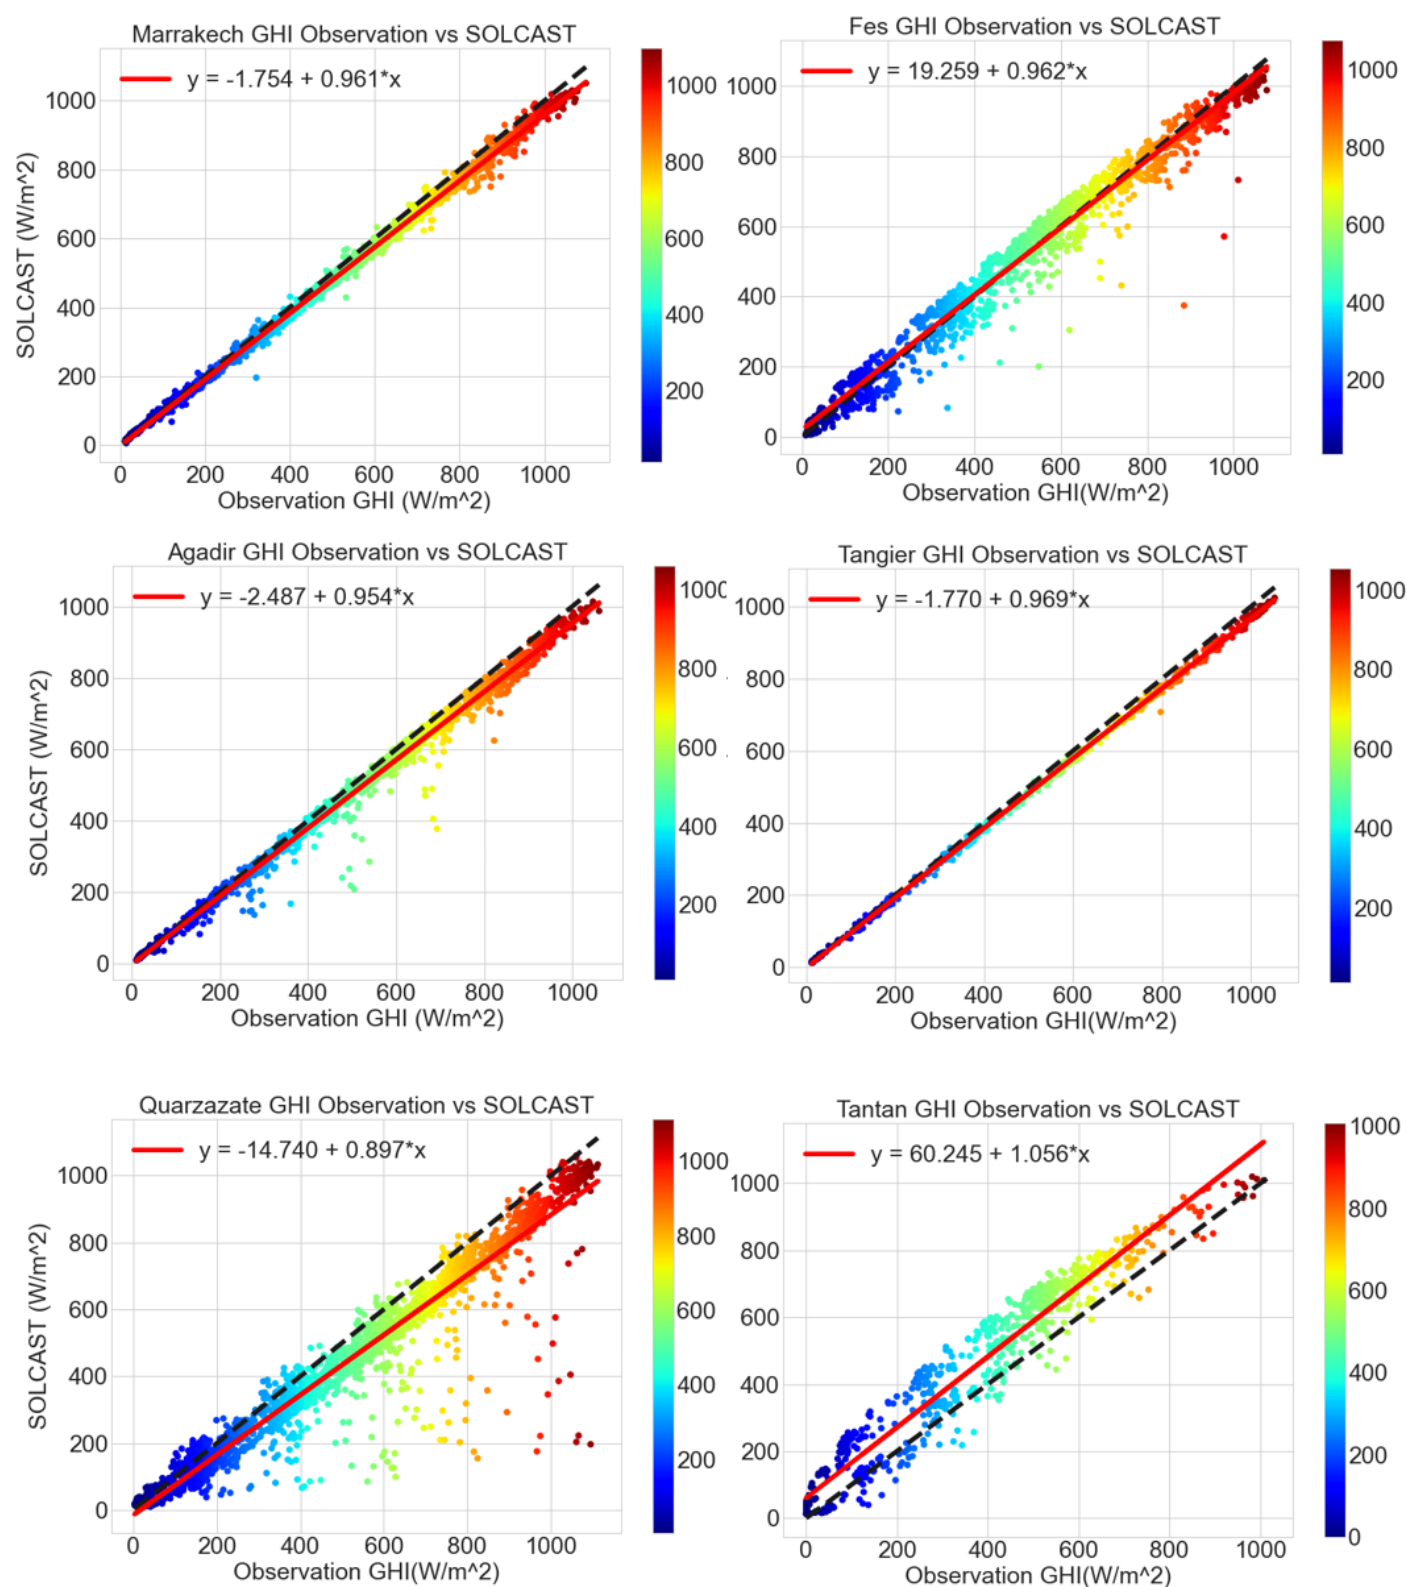

**Figure S6.** Scatter plot of McClear modelled hourly GHI and SOLCAST clear sky modelled hourly GHI at (a) Marrakech station, (b) Fes station, (c), Agadir station, (d) Quarzazate station, (e) Tangier and (f) Tantan.

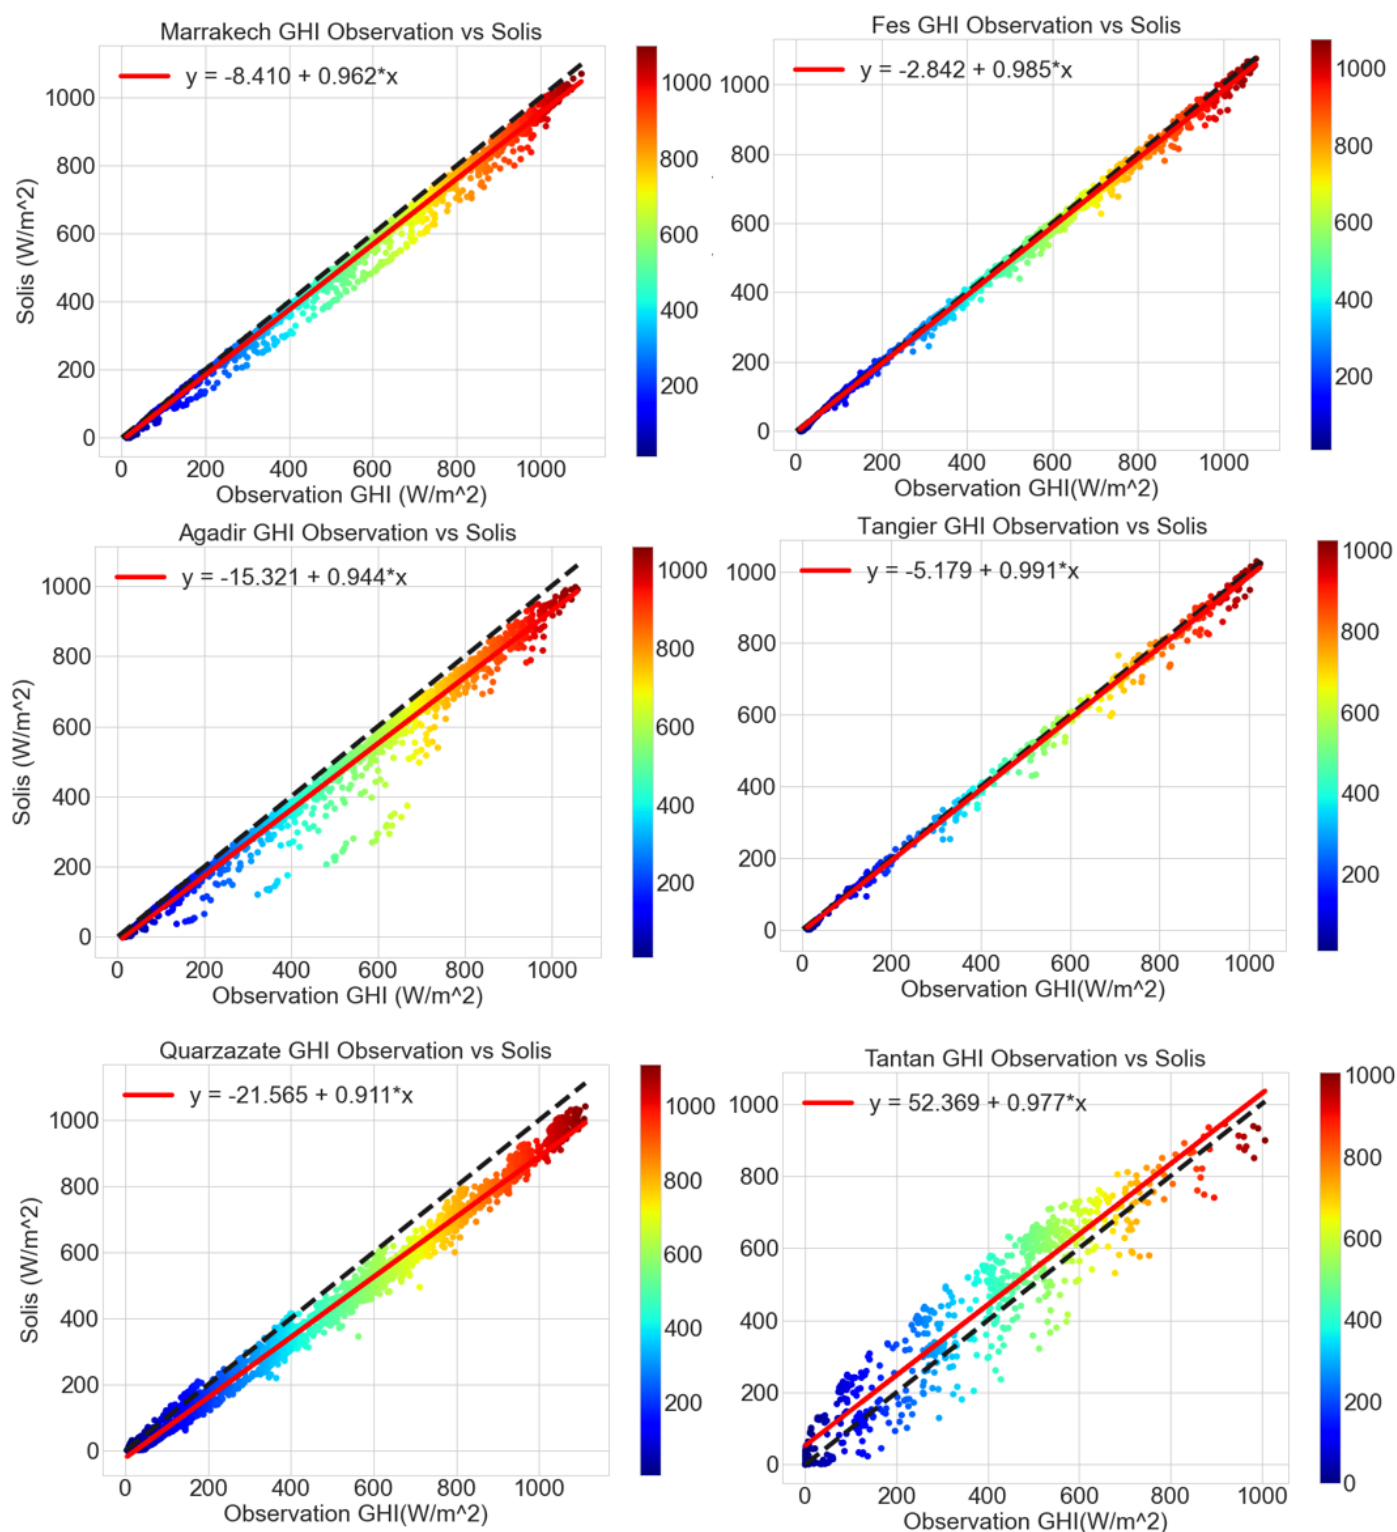

**Figure S7.** Scatter plot of McClear modelled hourly GHI and Solis clear sky modelled hourly GHI at (a) Marrakech station, (b) Fes station, (c), Agadir station, (d) Quarzazate station, (e) Tangier and (f) Tantan.
